# Supplementary material
Source: PubMed Central journal article supplement (PMC3619347)
Supplement: 1219047110_pnas.201219047SI.pdf [file 1219047110_pnas.201219047SI.pdf]

# Supporting Information

Mishiba et al. 10.1073/pnas.1219047110

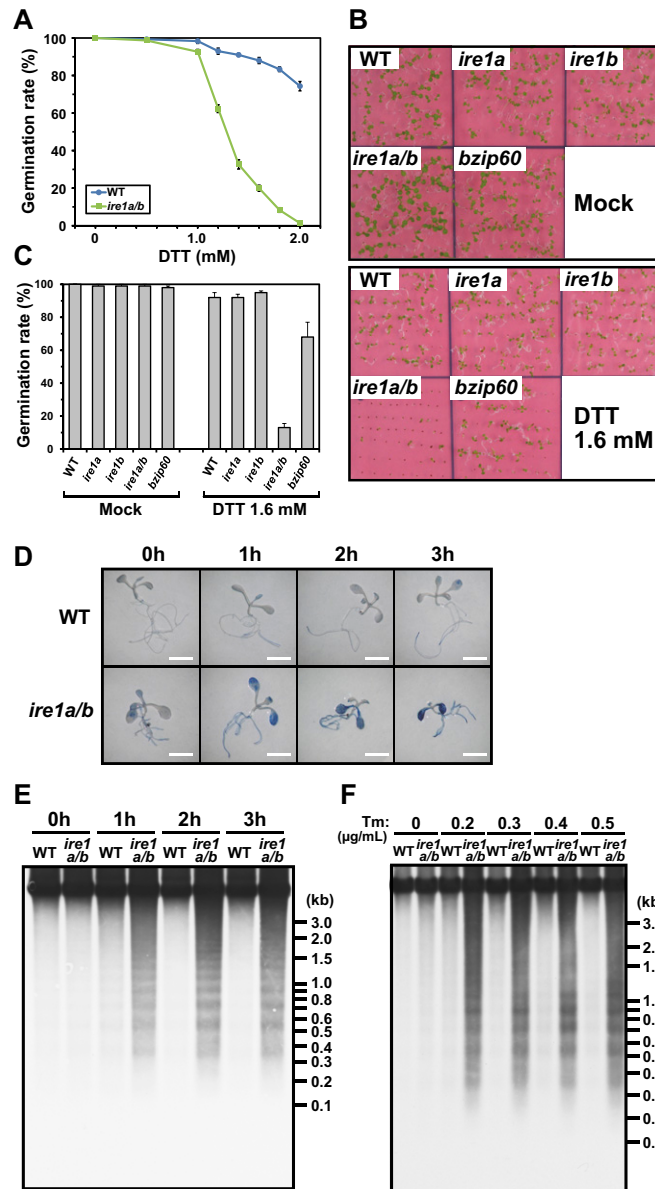

**Fig. S1.** Germination of mutants in the presence of DTT and observation of cell death in WT and *ire1a/b*. (A) Germination rates of WT and *ire1a/b* in different concentrations of DTT. The germination rate was determined as described (1) from three independent experiments ( $n = 100$ ). (B) Germination of each mutant with (Lower) or without (Upper) 1.6 mM DTT in the medium. (C) Germination rates of the each mutant from three independent experiments ( $n = 100$ ) with or without 1.6 mM DTT in the medium. (D) Evans blue staining of WT and *ire1a/b* seedlings treated with tunicamycin (Tm; 5  $\mu\text{g}/\text{mL}$ ) for 0–3 h. Seedlings were further cultured for 24 h and subjected to staining. (Bars: 5 mm.) (E) Detection of internucleosomal DNA fragmentation. DNA was extracted from whole tissues of WT and *ire1a/b* treated as in D and subjected to the assay. (F) Genomic DNAs extracted from aerial parts of WT and *ire1a/b* seedlings treated with Tm (0.2–0.5  $\mu\text{g}/\text{mL}$ ) for 72 h were subjected to the assay.

1. Nagashima Y, et al. (2011) Arabidopsis IRE1 catalyses unconventional splicing of bZIP60 mRNA to produce the active transcription factor. *Sci Rep* 1:29.











**Table S1. Primers used in this study**

| Primer                                           | Sequence                         |
|--------------------------------------------------|----------------------------------|
| <b>qPCR</b>                                      |                                  |
| Act8-F-rt for <i>ACT8</i>                        | TCAGCACTTCCAGCAGATG              |
| Act8-R-rt for <i>ACT8</i>                        | ATGCCTGGACCTGCTTCAT              |
| AT1G78850-F-rt for AT1G78850                     | CTTTGATTCTCCACCCGACA             |
| AT1G78850-R-rt for AT1G78850                     | CTTGGCTTCCATCACGAGAC             |
| BiP1-F-rt for <i>BiP1</i>                        | TCAGTCTGAGGAGATTAGTGCT           |
| BiP1-R-rt for <i>BiP1</i>                        | TGCCTTGAGCATCATTGAA              |
| BiP3-F-rt for <i>BiP3</i>                        | CGAAACGTCTGATTGGAAGAA            |
| BiP3-R-rt for <i>BiP3</i>                        | GGCTTCCCATCTTTGTTTAC             |
| bZIP60s-F-rt for spliced form of <i>bZIP60</i>   | AAGCAGGAGTCTGCTGTTGG             |
| bZIP60s-R-rt for spliced form of <i>bZIP60</i>   | TTTGTGTGGGACATATAAGGGAAT         |
| bZIP60u-F-rt for unspliced form of <i>bZIP60</i> | AGTCTGCTGTGCTCTTGTTGG            |
| bZIP60u-R-rt for unspliced form of <i>bZIP60</i> | GCAACACTTTGTGTGGGACATA           |
| HsfA2-F-rt for <i>HSFA2</i>                      | AGCTTTGTGGTGTGGGATTCT            |
| HsfA2-R-rt for <i>HSFA2</i>                      | TGCAAATCCCATCTATCTGGA            |
| HsfA2II-F-rt for <i>HSFA2-II</i>                 | CCACGTTACTTCAAGCATAGCA           |
| HsfA2II-R-rt for <i>HSFA2-II</i>                 | TTCTGAATCCCTTTATAGCTGAAGAC       |
| HsfA7a-F-rt for <i>HSFA7a</i>                    | TCTCCACGATTCTCCTTCTC             |
| HsfA7a-R-rt for <i>HSFA7a</i>                    | GCAAATCCCATCTCTCTGCT             |
| HSP90.1-F-rt for <i>HSP90.1</i>                  | AAAGAAATCTTCTCCGTGAGC            |
| HSP90.1-R-rt for <i>HSP90.1</i>                  | AATGAAGAGTTCAGGCTGTCCA           |
| IRE1A-F-rt for <i>IRE1A</i>                      | GCGCTACAGGCGTTACAAATA            |
| IRE1A-R-rt for <i>IRE1A</i>                      | TCGTGGAATCCTTCTGGAAC             |
| IRE1B-F-rt for <i>IRE1B</i>                      | AGTGGGGAAAAACCAGTTCC             |
| IRE1B-R-rt for <i>IRE1B</i>                      | AACCAAGTCTCGGAAACAGTG            |
| PR-4-F-rt for <i>PR-4</i>                        | GTGGGATGCTGATAAGCCGTA            |
| PR-4-R-rt for <i>PR-4</i>                        | TGCAGCATTGTTCTTGTTCT             |
| PRX34-F-rt for <i>PRX34</i>                      | ATGCGCAGATATGCTCACCA             |
| PRX34-F-rt for <i>PRX34</i>                      | AATGGAGCTGGAAGATTGCT             |
| <b>cRACE</b>                                     |                                  |
| PR-4-cRACE-RT(5'P) for RT                        | TTATGTAGACCG (5' phosphorylated) |
| PR-4-cRACE-F1 for first PCR                      | TTCGGCCATTGATCGGTTTG             |
| PR-4-cRACE-R1 for first PCR                      | TTTCTGGAATCAGGCTGCC              |
| PR-4-cRACE-F2 for second PCR                     | ATTATGTAATGATTTGAGGTCAATATCG     |
| PR-4-cRACE-R2 for second PCR                     | ATGAGATGGCCTTGTTGATAGC           |
| <b>Preparation of probes</b>                     |                                  |
| PR-4-probe-F for <i>PR-4</i> probe               | TCTGCTGCAGTCAGTACGGTTA           |
| PR-4-probe-F for <i>PR-4</i> probe               | GCTGCATTGGTCCACTATTCTC           |
| ACT8-probe-F for <i>ACT8</i> probe               | AACAGCAGAACGGGAAATTG             |
| ACT8-probe-R for <i>ACT8</i> probe               | CTGGAAAGTCTGAGGGAAG              |

## Other Supporting Information Files

[Dataset S1 \(XLS\)](#)

[Dataset S2 \(XLS\)](#)
